# Supplementary material for: Marangoni self-propelled capsules in a maze: pollutants ‘sense and act’ in complex channel environments
Source: Royal Society of Chemistry journal article supplement (doi:10.1039/c4lc00431k), 2014-01-01
Supplement: c4lc00431k1.pdf [file c4lc00431k1.pdf]

# **Marangoni Self-Propelled Capsules in a Maze: Pollutants ‘Sense and Act’ in Complex Channel Environments**

Guanjia Zhao<sup>a</sup>, Martin Pumera<sup>\*a</sup>

## **Electronic Supplementary Information**

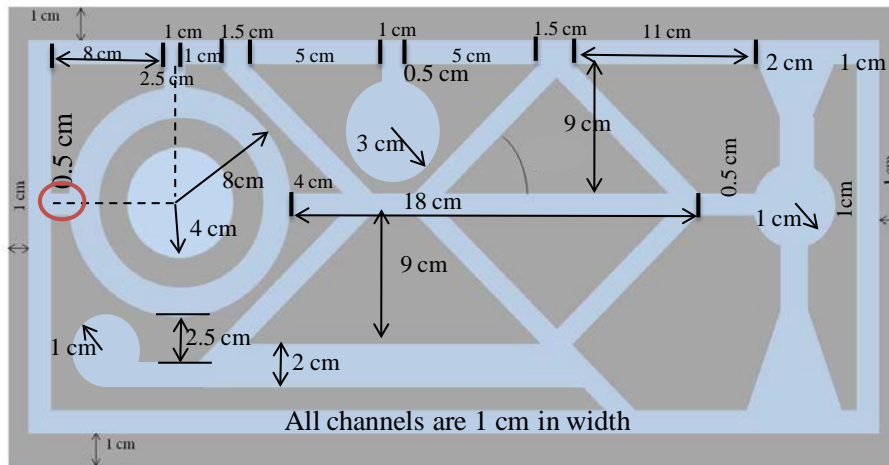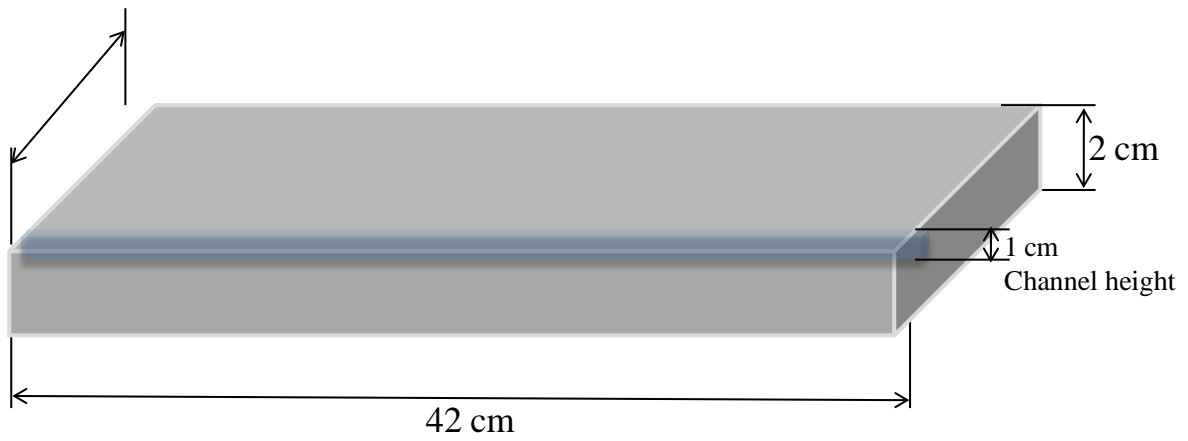

Figure S-1. Drawing In the design of the channel maze used in this work.

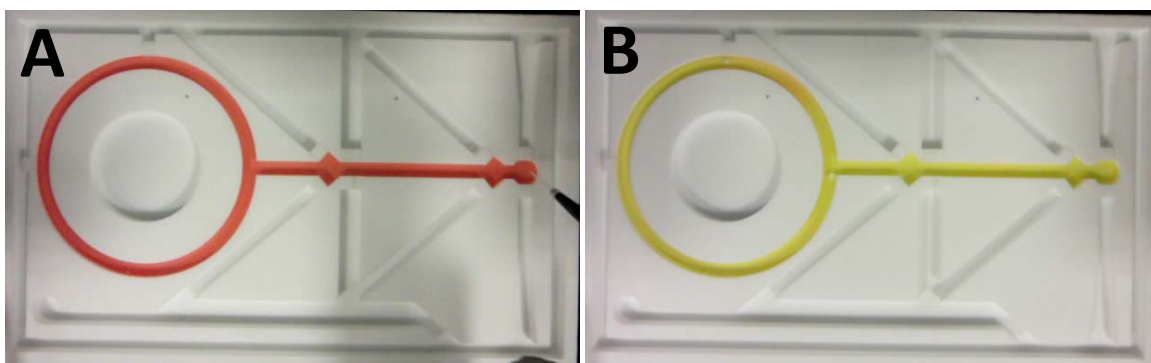

Figure S-2. Enhanced distribution of base into the modified design of maze channel. (A) The pH indicator methyl red was mixed into the water. (B) After application of 2 of the 4.5 wt% imdazole incorporated motors, it took 3 min for the whole channel to change color.

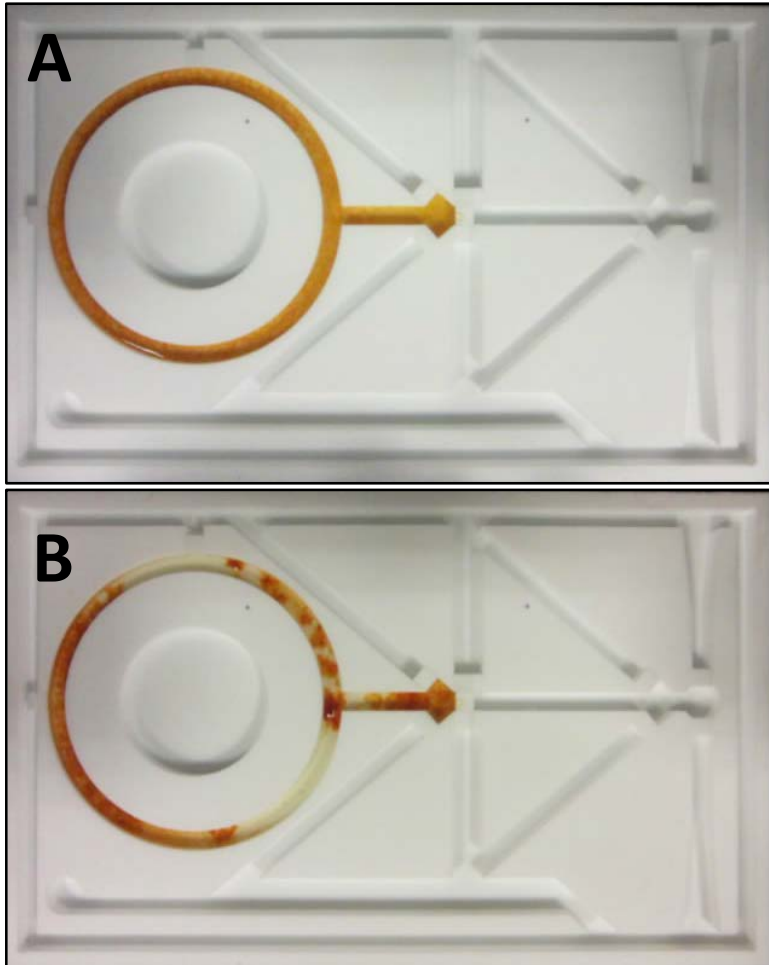

Figure S-3. Environmental clean-up using running SDS-incorporated capsule motors in another modified channel.
